# Supplementary material
Source: Copernicus journal article supplement (doi:10.5194/essd-2026-345)
Supplement: Supplementary file 1 [file essd-2026-345-supplement.pdf]

# **Supplementary Materials for BMAT: A footprint-level building facade material dataset for 73 major cities worldwide**

**This PDF file includes:**

Supplementary Text

Figures S1 to S9

Tables S1 to S2

## **Contents**

|                                                                                      |           |
|--------------------------------------------------------------------------------------|-----------|
| <b>S1 Supplementing missing building heights for each building</b>                   | <b>3</b>  |
| <b>S2 Model classification results comparison</b>                                    | <b>5</b>  |
| <b>S3 Spatiotemporal coverage of buildings with material attributes</b>              | <b>6</b>  |
| <b>S4 Spatial heterogeneity of building facade materials across different cities</b> | <b>7</b>  |
| <b>S5 Building material composition across construction eras</b>                     | <b>12</b> |

## 1 **S1 Supplementing missing building heights for each building**

2 Building footprints in Overture Maps lack height records for a substantial portion of buildings, particu-  
3 larly in developing regions. To support downstream applications such as energy modeling, disaster risk  
4 assessment, and urban carbon estimation using this dataset, we supplemented these missing values using  
5 the Global Building Atlas (GBA) (Zhu et al., 2025), a global raster dataset at  $3\text{ m} \times 3\text{ m}$  resolution that  
6 provides grid-cell-level building height estimates.

7 Specifically, we evaluated two aggregation strategies in cities where Overture Maps height records  
8 are relatively complete, using those records as reference values (Supplementary Figure. S1). Assigning  
9 the mean height ( $\mu$ ) of all GBA cells within a building footprint consistently underestimated building  
10 height, likely because boundary cells partially covering non-building surfaces such as roads record lower  
11 values. To compensate, we instead assigned  $\mu + \sigma$ , which yielded closer agreement with Overture Maps  
12 reference values across all tested cities. We therefore retained original height records where Overture  
13 Maps provides them, and applied the  $\mu + \sigma$  estimator to supplement height information for all remaining  
14 footprints.

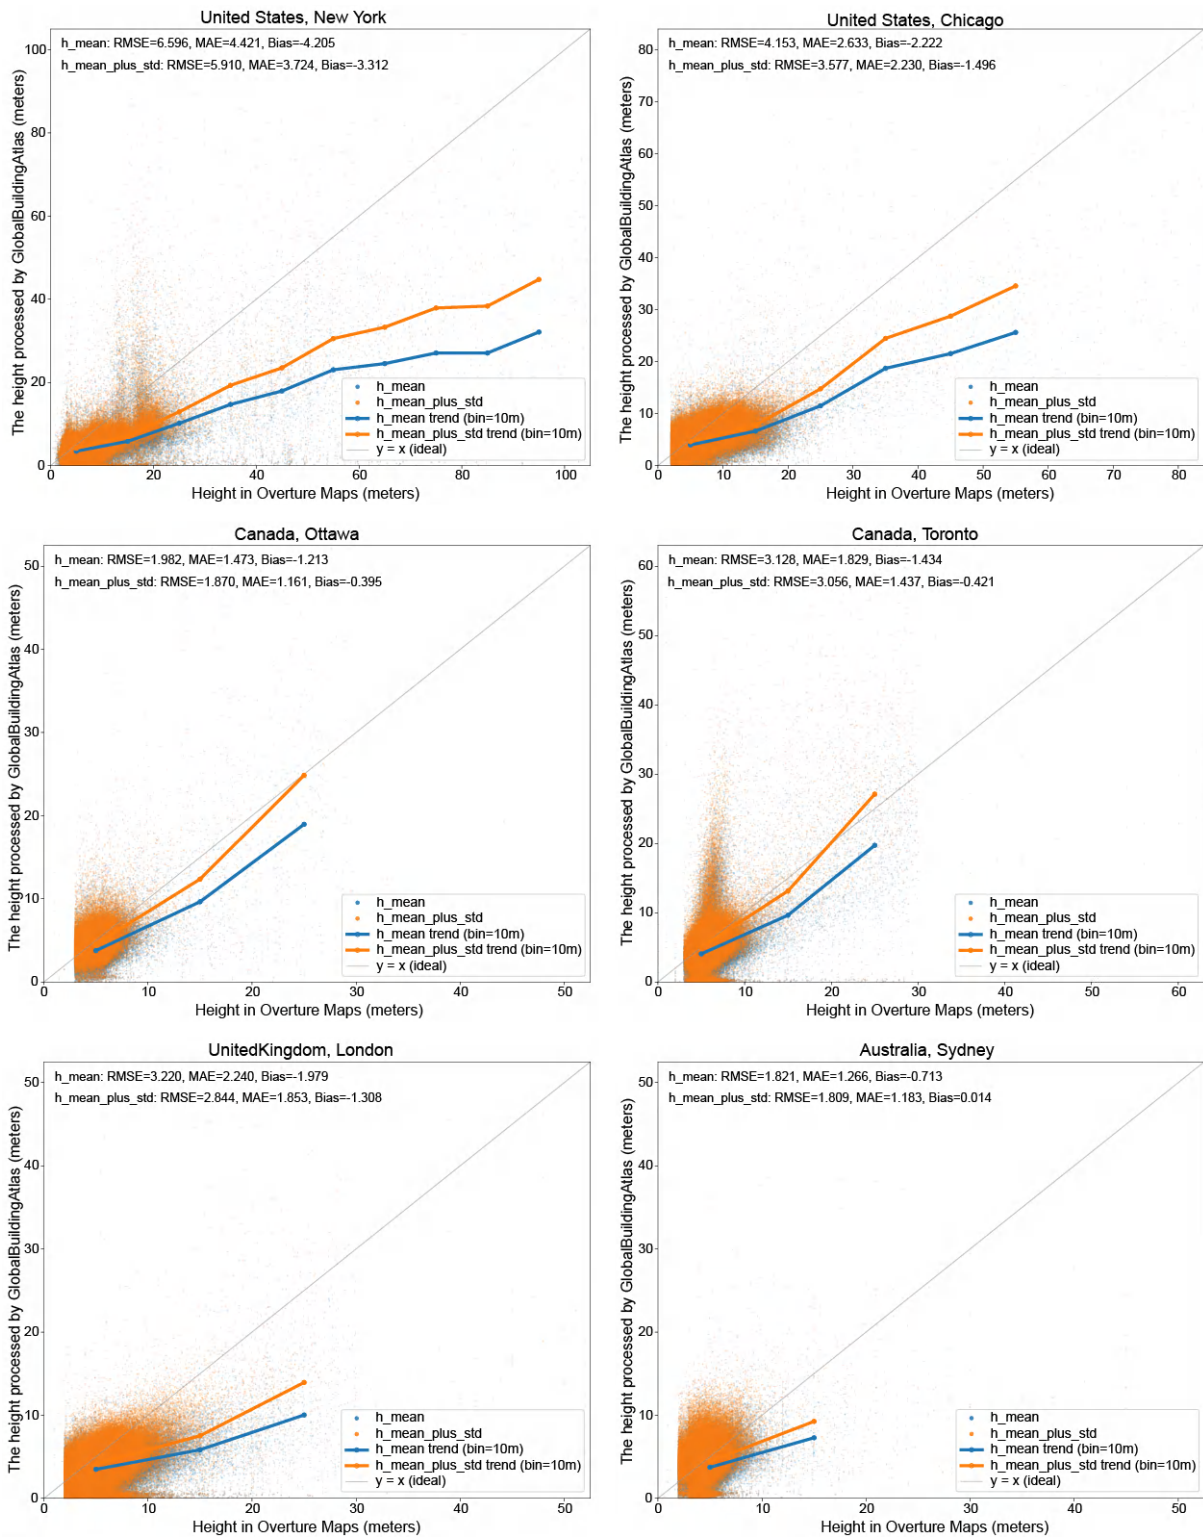

**Supplementary Figure. S1.** Comparison of two raster-to-vector height assignment methods against Overture Maps reference values across six cities. Each point represents one building. Trend lines (10 m bins) show that the mean-plus-standard-deviation estimator (orange) outperforms the mean alone (blue) across all cities, with consistently lower RMSE and reduced negative bias.

## 15 S2 Model classification results comparison

16 Table S1 compares the classification performance of the fine-tuned Qwen2.5 model against traditional  
 17 vision backbones on the test set. The results demonstrate that the fine-tuned Qwen2.5 achieves superior  
 18 performance.

**Supplementary Table S1.** Class-wise performance comparison with Traditional Models

| Category | Metric    | VGG16 | ViT  | Res50 | Shuff | Res101 | EffB0 | Dense | MbNet | Ours        |
|----------|-----------|-------|------|-------|-------|--------|-------|-------|-------|-------------|
| Overall  | Accuracy  | 0.83  | 0.82 | 0.82  | 0.79  | 0.82   | 0.84  | 0.84  | 0.82  | <b>0.91</b> |
|          | Precision | 0.82  | 0.81 | 0.80  | 0.78  | 0.81   | 0.82  | 0.83  | 0.81  | <b>0.91</b> |
|          | Recall    | 0.80  | 0.79 | 0.80  | 0.76  | 0.80   | 0.82  | 0.82  | 0.80  | <b>0.91</b> |
|          | F1-Score  | 0.81  | 0.80 | 0.80  | 0.77  | 0.80   | 0.82  | 0.82  | 0.80  | <b>0.91</b> |
| Brick    | Precision | 0.87  | 0.82 | 0.84  | 0.80  | 0.84   | 0.86  | 0.85  | 0.85  | <b>0.92</b> |
|          | Recall    | 0.84  | 0.82 | 0.84  | 0.79  | 0.82   | 0.83  | 0.85  | 0.83  | <b>0.94</b> |
|          | F1-Score  | 0.86  | 0.82 | 0.84  | 0.79  | 0.83   | 0.85  | 0.85  | 0.84  | <b>0.93</b> |
| Concrete | Precision | 0.77  | 0.76 | 0.78  | 0.71  | 0.75   | 0.77  | 0.81  | 0.77  | <b>0.86</b> |
|          | Recall    | 0.75  | 0.73 | 0.71  | 0.70  | 0.74   | 0.78  | 0.74  | 0.72  | <b>0.85</b> |
|          | F1-Score  | 0.76  | 0.75 | 0.75  | 0.70  | 0.75   | 0.77  | 0.78  | 0.74  | <b>0.86</b> |
| Glass    | Precision | 0.85  | 0.88 | 0.86  | 0.87  | 0.88   | 0.88  | 0.86  | 0.86  | <b>0.95</b> |
|          | Recall    | 0.93  | 0.95 | 0.94  | 0.92  | 0.93   | 0.95  | 0.95  | 0.94  | <b>0.96</b> |
|          | F1-Score  | 0.89  | 0.91 | 0.90  | 0.89  | 0.90   | 0.91  | 0.91  | 0.90  | <b>0.95</b> |
| Metal    | Precision | 0.78  | 0.77 | 0.74  | 0.73  | 0.79   | 0.78  | 0.79  | 0.76  | <b>0.88</b> |
|          | Recall    | 0.72  | 0.73 | 0.72  | 0.69  | 0.72   | 0.73  | 0.74  | 0.72  | <b>0.88</b> |
|          | F1-Score  | 0.75  | 0.75 | 0.73  | 0.71  | 0.76   | 0.76  | 0.77  | 0.74  | <b>0.88</b> |
| Other    | Precision | 0.81  | 0.83 | 0.77  | 0.76  | 0.76   | 0.74  | 0.78  | 0.79  | <b>0.89</b> |
|          | Recall    | 0.67  | 0.66 | 0.72  | 0.60  | 0.66   | 0.74  | 0.69  | 0.66  | <b>0.91</b> |
|          | F1-Score  | 0.73  | 0.73 | 0.75  | 0.67  | 0.70   | 0.74  | 0.74  | 0.72  | <b>0.90</b> |
| Stone    | Precision | 0.89  | 0.88 | 0.87  | 0.87  | 0.89   | 0.89  | 0.92  | 0.89  | <b>0.95</b> |
|          | Recall    | 0.87  | 0.87 | 0.88  | 0.84  | 0.87   | 0.89  | 0.88  | 0.88  | <b>0.94</b> |
|          | F1-Score  | 0.88  | 0.87 | 0.88  | 0.86  | 0.88   | 0.89  | 0.90  | 0.88  | <b>0.95</b> |
| Stucco   | Precision | 0.82  | 0.81 | 0.80  | 0.77  | 0.82   | 0.85  | 0.83  | 0.81  | <b>0.89</b> |
|          | Recall    | 0.84  | 0.82 | 0.81  | 0.81  | 0.83   | 0.83  | 0.85  | 0.83  | <b>0.89</b> |
|          | F1-Score  | 0.83  | 0.81 | 0.80  | 0.79  | 0.82   | 0.84  | 0.84  | 0.82  | <b>0.89</b> |
| Tile     | Precision | 0.73  | 0.73 | 0.68  | 0.66  | 0.69   | 0.76  | 0.74  | 0.73  | <b>0.88</b> |
|          | Recall    | 0.71  | 0.68 | 0.71  | 0.67  | 0.71   | 0.73  | 0.72  | 0.72  | <b>0.83</b> |
|          | F1-Score  | 0.72  | 0.70 | 0.70  | 0.66  | 0.70   | 0.74  | 0.73  | 0.72  | <b>0.85</b> |
| Wood     | Precision | 0.87  | 0.85 | 0.86  | 0.84  | 0.85   | 0.87  | 0.86  | 0.85  | <b>0.96</b> |
|          | Recall    | 0.90  | 0.88 | 0.86  | 0.83  | 0.89   | 0.91  | 0.91  | 0.90  | <b>0.97</b> |
|          | F1-Score  | 0.88  | 0.87 | 0.86  | 0.84  | 0.87   | 0.89  | 0.88  | 0.88  | <b>0.97</b> |

*Note:* Abbreviations: VGG16: VGG16 (Simonyan and Zisserman, 2014); ViT: Vision Transformer (ViT-B/16) (Dosovitskiy, 2020); Res50: ResNet-50 (He et al., 2016); Shuff: ShuffleNetV2 (Ma et al., 2018); Res101: ResNet-101 (He et al., 2016); EffB0: EfficientNet-B0 (Tan and Le, 2019); Dense: DenseNet-161 (Huang et al., 2017); MbNet: MobileNetV3-Large (Howard et al., 2019); **Ours**: Our fine-tuned Qwen2.5-7B model.

### 19 S3 Spatiotemporal coverage of buildings with material attributes

20 Supplementary Figure. S2 illustrates spatiotemporal sampling characteristics of street view platforms.  
21 GSV demonstrates more frequent updates and complete spatial coverage per cycle, while BSV shows  
22 longer intervals and more fragmented coverage. Both platforms exhibit systematic gaps in densely built  
23 areas with narrow streets inaccessible to collection vehicles, such as informal settlements and historic  
24 alleyways (Supplementary Figure. S3).

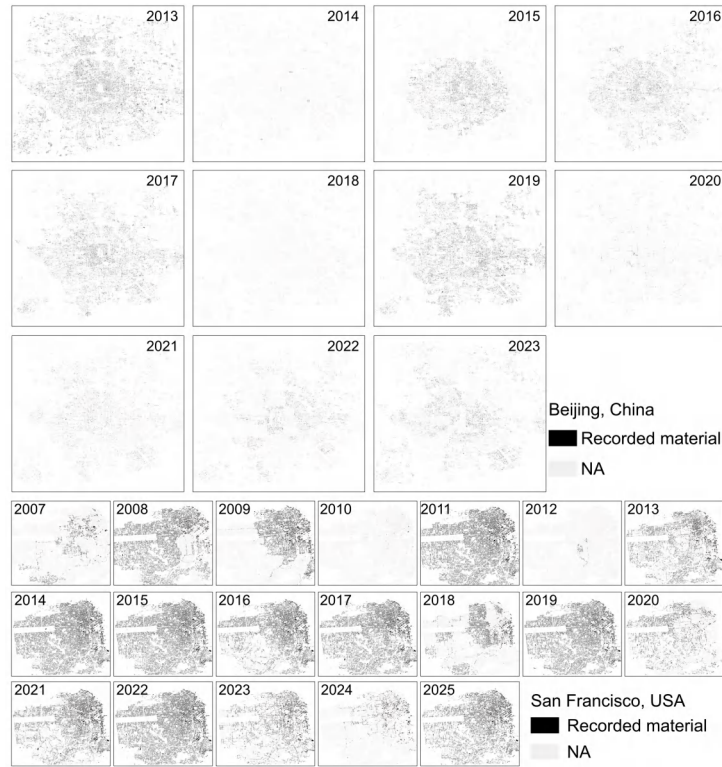

**Supplementary Figure. S2.** Spatiotemporal availability of building material records: Reflecting sampling differences between BSV and GSV through the case studies of Beijing and San Francisco.

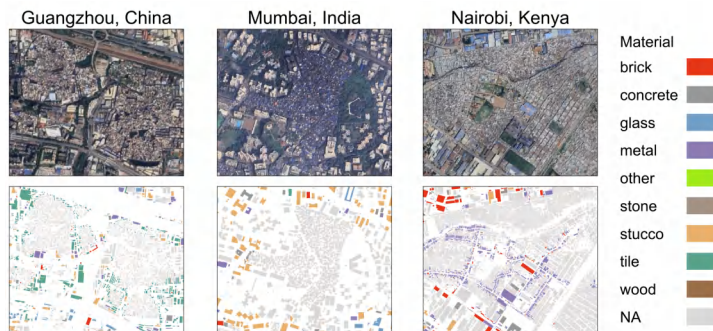

**Supplementary Figure. S3.** Missing building material attributes in high-density areas. Imagery © 2025 Airbus, CNES/Airbus, Maxar Technologies.

25 **S4 Spatial heterogeneity of building facade materials across different cities**

26 Supplementary Figures. S4-S5 present the proportion of buildings with material attributes and mate-  
 27 rial diversity (entropy values) across different buffer zones from city centers. Material diversity varies  
 28 distinctly among cities: some show minimal variation (e.g., Beijing, Shanghai, Delhi, Mumbai, Tokyo,  
 29 Nairobi, Lagos, Dakar—predominantly Asian and African cities), some exhibit declining trends (e.g.,  
 30 Sydney, Ottawa, Chicago, Los Angeles, San Francisco—predominantly cities in the Americas and Ocea-  
 31 nia), while others display increasing diversity (e.g., Paris, Rome, Moscow, Amsterdam, London—predominantly  
 32 European cities).

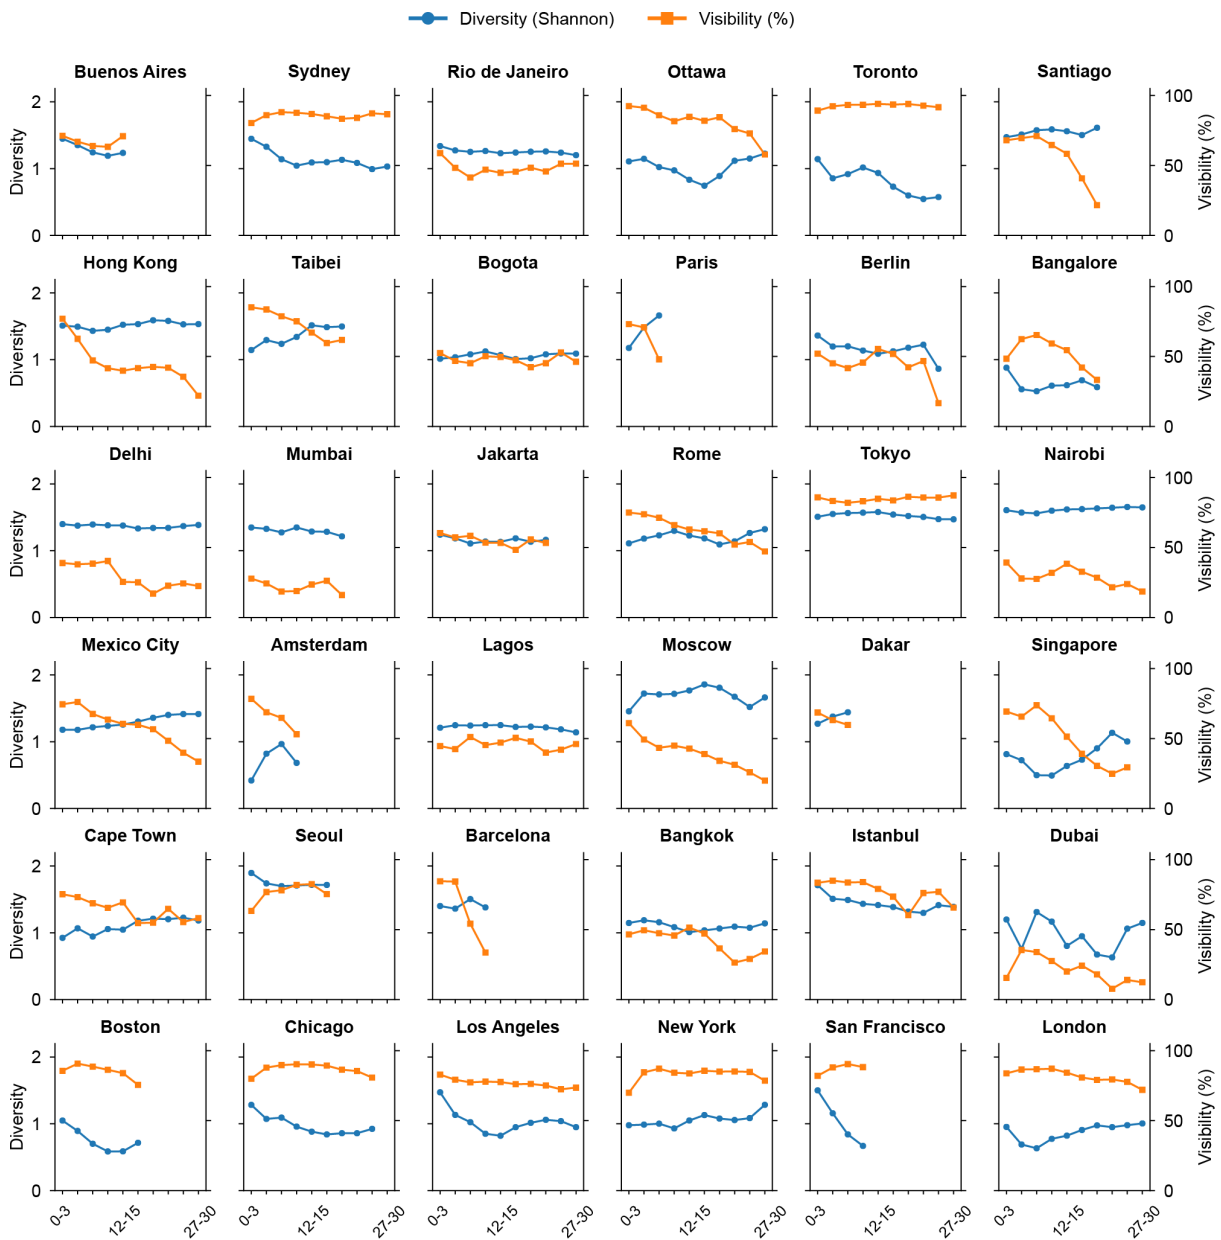

**Supplementary Figure. S4.** Trends in Shannon diversity and visibility rates across buffer zones in representative GSV-derived cities.

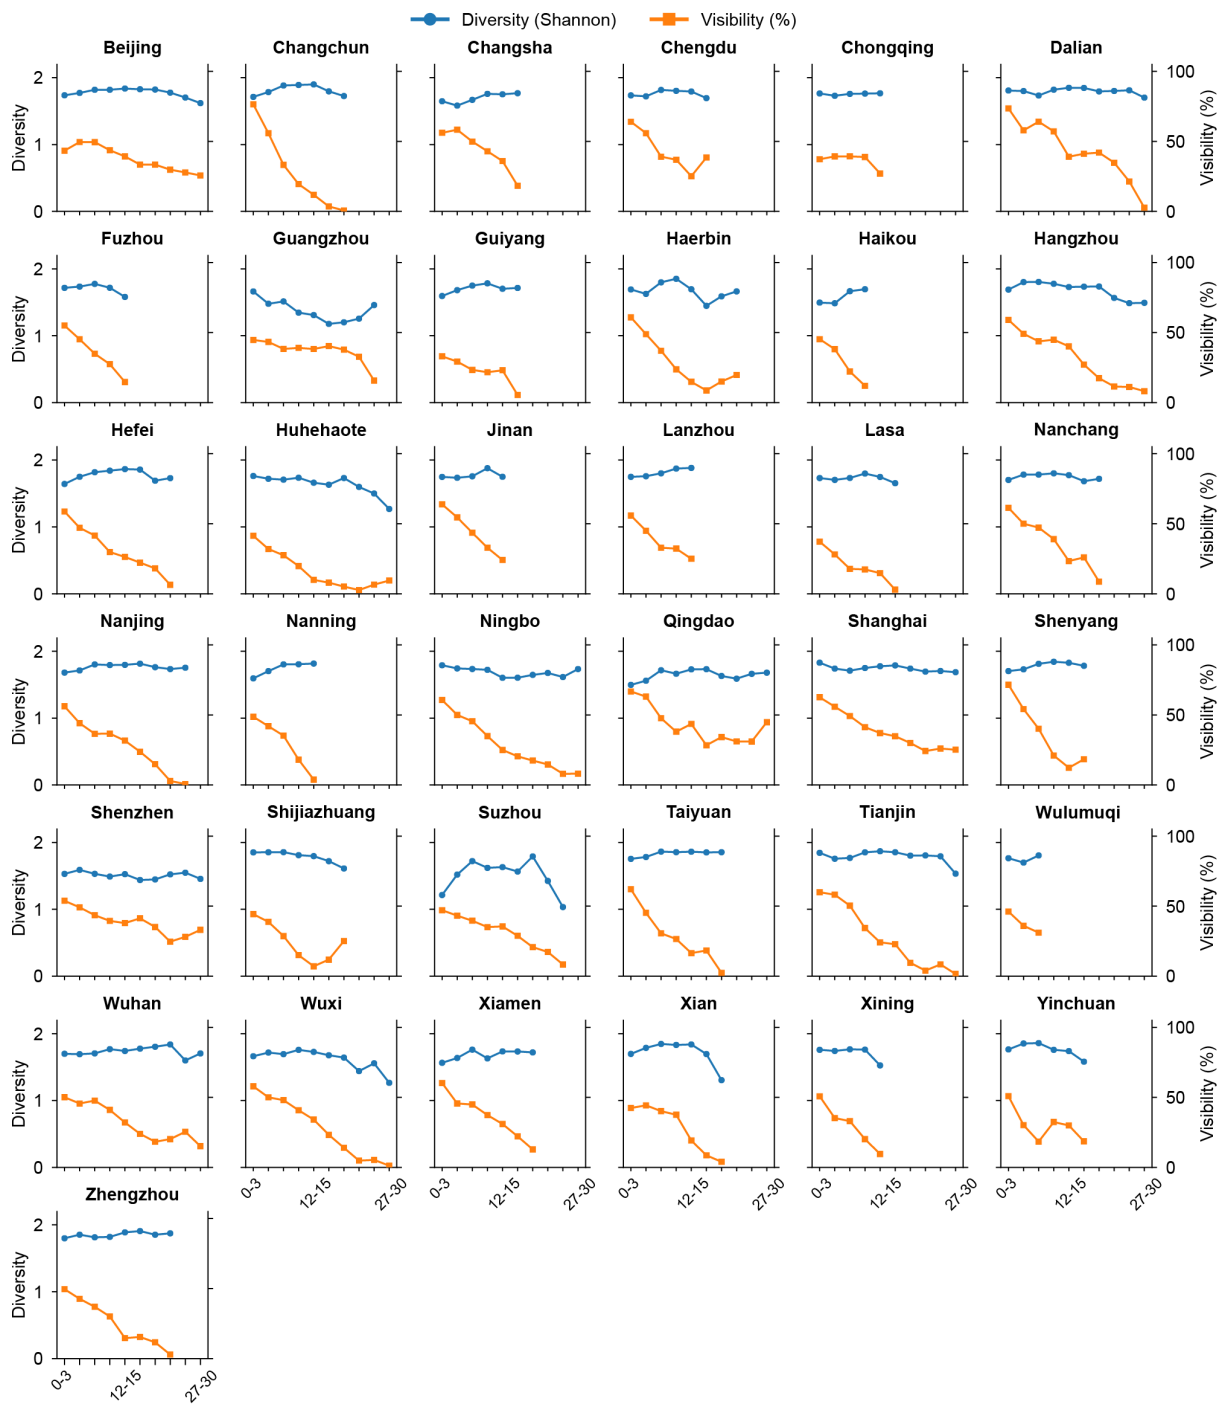

**Supplementary Figure. S5.** Trends in Shannon diversity and visibility rates across buffer zones in BSV-derived cities.

**Supplementary Table S2.** Statistics of recorded building materials in different buffer zones (China)

| City         | w/ Mat. <sup>1</sup> | 0–5 km |         | 0–10 km |         | 0–15 km |         |
|--------------|----------------------|--------|---------|---------|---------|---------|---------|
|              |                      | Count  | Prop(%) | Count   | Prop(%) | Count   | Prop(%) |
| Beijing      | 308,555              | 34,479 | 46.1    | 93,444  | 48.1    | 154,636 | 44.9    |
| Changchun    | 74,336               | 21,266 | 65.8    | 52,621  | 42.0    | 67,000  | 29.9    |
| Changsha     | 72,507               | 17,230 | 57.4    | 47,887  | 52.5    | 66,368  | 48.1    |
| Chengdu      | 92,899               | 22,044 | 60.9    | 60,510  | 45.8    | 85,174  | 40.5    |
| Chongqing    | 37,117               | 9,446  | 37.9    | 25,100  | 39.1    | 34,506  | 37.2    |
| Dalian       | 83,553               | 12,545 | 69.8    | 33,929  | 64.2    | 50,973  | 55.5    |
| Fuzhou       | 40,855               | 19,280 | 50.3    | 35,665  | 42.5    | 37,929  | 40.5    |
| Guangzhou    | 231,084              | 19,430 | 44.0    | 72,270  | 40.6    | 136,540 | 39.5    |
| Guiyang      | 26,440               | 10,741 | 31.6    | 18,864  | 28.3    | 24,531  | 26.5    |
| Haerbin      | 58,893               | 9,023  | 54.5    | 30,963  | 40.2    | 46,291  | 28.3    |
| Haikou       | 29,197               | 17,415 | 42.1    | 26,849  | 34.5    | 27,135  | 33.5    |
| Hangzhou     | 158,114              | 17,416 | 52.8    | 48,602  | 47.4    | 88,384  | 44.8    |
| Hefei        | 65,424               | 20,692 | 53.2    | 42,135  | 45.9    | 54,133  | 39.6    |
| Huhehaote    | 43,741               | 9,432  | 36.3    | 28,359  | 28.7    | 37,348  | 23.1    |
| Jinan        | 50,462               | 20,471 | 59.6    | 45,205  | 49.8    | 47,353  | 48.4    |
| Lanzhou      | 15,565               | 7,673  | 49.8    | 12,532  | 43.2    | 14,446  | 41.1    |
| Lasa         | 21,936               | 12,163 | 34.3    | 16,741  | 28.0    | 20,132  | 24.8    |
| Nanchang     | 70,973               | 15,698 | 55.6    | 42,676  | 49.5    | 59,451  | 41.8    |
| Nanjing      | 112,001              | 25,227 | 50.9    | 49,897  | 42.7    | 82,241  | 38.8    |
| Nanning      | 60,565               | 21,891 | 44.4    | 51,599  | 38.0    | 55,542  | 31.4    |
| Ningbo       | 108,548              | 13,063 | 54.3    | 42,113  | 46.8    | 69,052  | 37.6    |
| Qingdao      | 74,315               | 16,059 | 65.6    | 33,978  | 55.0    | 46,490  | 50.6    |
| Shanghai     | 445,399              | 29,255 | 59.0    | 87,593  | 51.3    | 151,928 | 45.0    |
| Shenyang     | 77,340               | 22,087 | 63.3    | 56,099  | 44.4    | 69,890  | 32.7    |
| Shenzhen     | 194,831              | 10,866 | 52.2    | 29,830  | 45.5    | 55,838  | 41.9    |
| Shijiazhuang | 62,466               | 22,245 | 41.7    | 50,749  | 33.6    | 55,379  | 27.4    |
| Suzhou       | 39,509               | 18,400 | 46.5    | 27,127  | 43.1    | 34,077  | 41.5    |
| Taiyuan      | 57,037               | 19,964 | 54.5    | 41,024  | 39.8    | 49,627  | 34.3    |
| Tianjin      | 128,095              | 25,586 | 59.0    | 73,186  | 52.4    | 99,347  | 42.2    |
| Wulumuqi     | 13,395               | 9,990  | 41.7    | 12,589  | 39.2    | 12,589  | 39.2    |
| Wuhan        | 134,976              | 18,863 | 47.1    | 57,197  | 46.9    | 86,387  | 41.9    |
| Wuxi         | 87,361               | 21,535 | 53.0    | 54,189  | 49.6    | 71,248  | 45.6    |
| Xiamen       | 55,090               | 13,457 | 52.7    | 30,851  | 46.8    | 44,758  | 41.5    |
| Xian         | 94,680               | 29,832 | 43.6    | 66,739  | 41.7    | 85,951  | 37.9    |
| Xining       | 16,560               | 9,308  | 43.1    | 14,381  | 38.8    | 15,104  | 35.5    |
| Yinchuan     | 20,380               | 11,825 | 41.9    | 16,098  | 33.1    | 18,634  | 32.8    |
| Zhengzhou    | 91,260               | 17,023 | 46.4    | 49,615  | 39.3    | 70,959  | 31.0    |

<sup>1</sup> “w/ Mat.” refers to the number of buildings with identified material information.

33 Supplementary Figures. S6-S7 illustrate the proportional distribution of facade materials across urban  
 34 buffer zones. Chinese cities exhibit greater facade material diversity, with stucco and tile as pre-  
 35 dominant materials, while other cities display more homogeneous compositions dominated by brick or  
 36 stucco. Notably, glass facade proportion consistently declines with distance from urban centers across all  
 37 cities, reflecting the concentration of modern commercial architecture and glass curtain wall buildings in  
 38 urban centers.

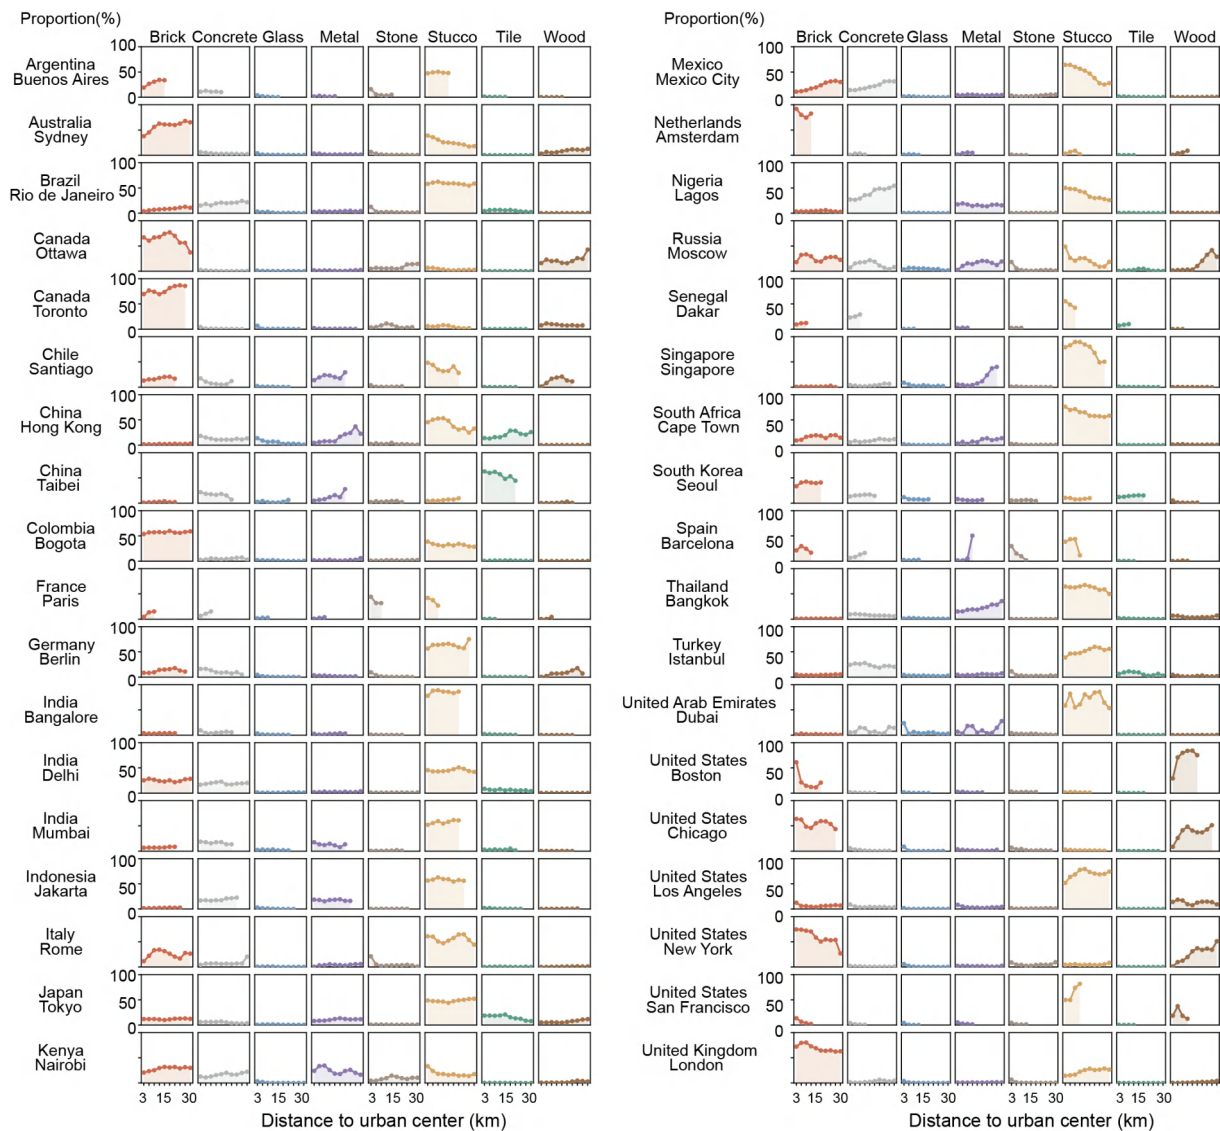

**Supplementary Figure. S6.** Variations in building material proportions with increasing distance from the urban center across GSV-derived cities.

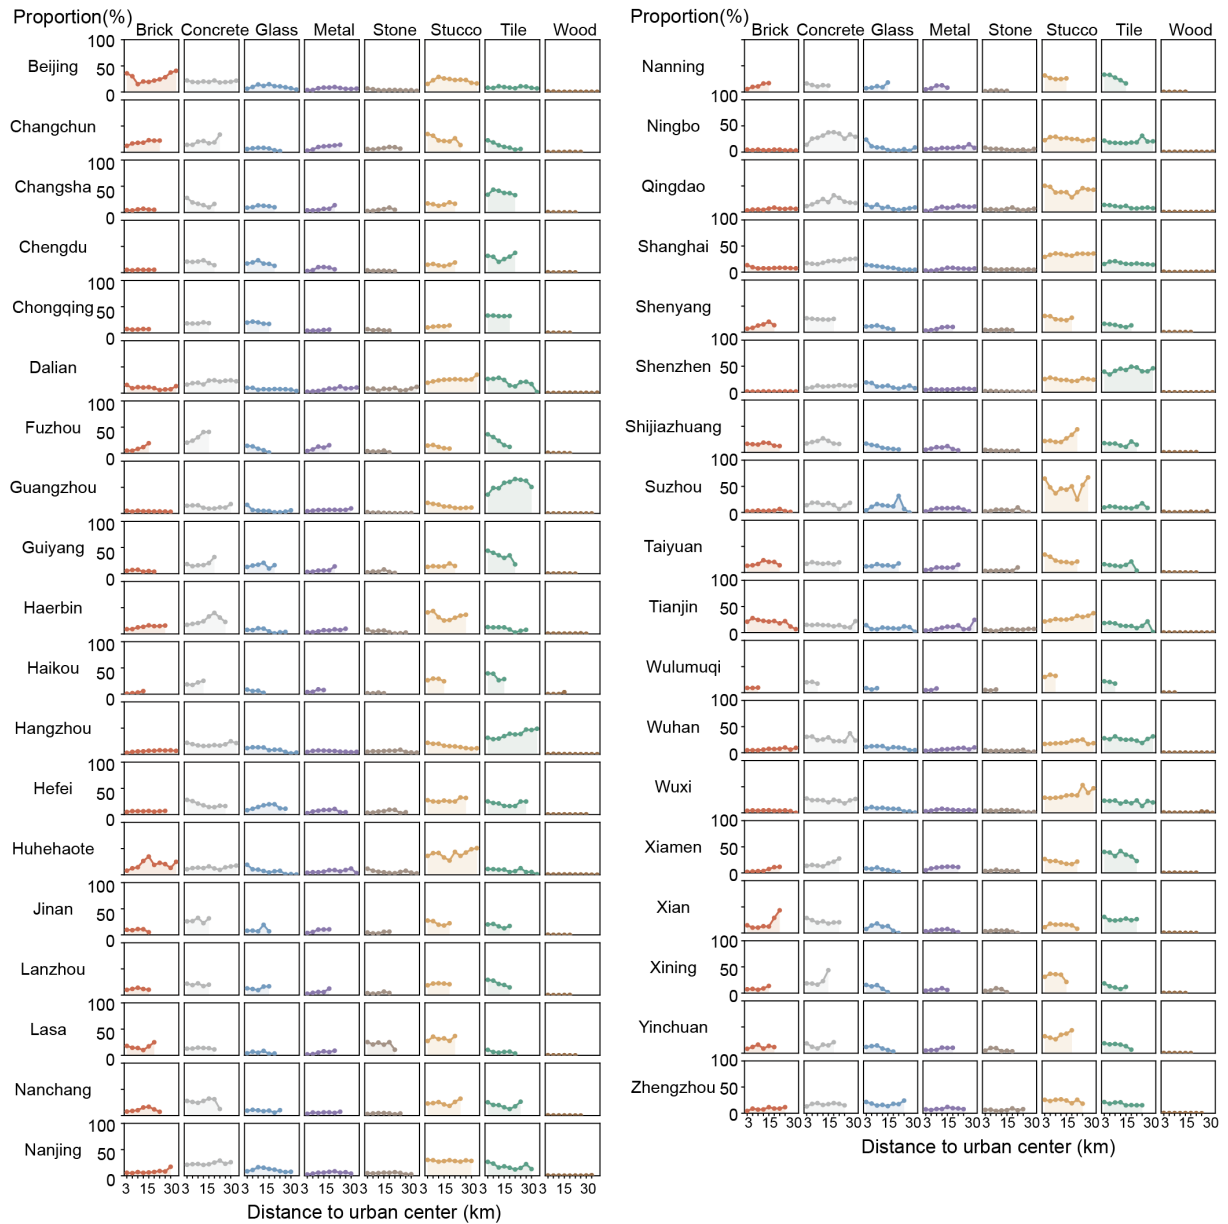

**Supplementary Figure. S7.** Variations in building material proportions with increasing distance from the urban center across BSV-derived cities.

## 39 **S5 Building material composition across construction eras**

40 Supplementary Figure. S8 illustrates how building facade material composition varies with construction  
41 era across four cities. Before 1950, facades in each city were dominated by a single material — brick in  
42 Boston, New York, and Amsterdam, and stucco in Paris — with little variation across buildings. After  
43 1950, a wider range of materials began to appear, and by 2000, glass and metal had become increasingly  
44 common, driven by the rise of modern commercial towers and industrial buildings. Notably, when com-  
45 paring the earliest and latest recorded materials for buildings constructed after 2000, glass proportion  
46 is higher in the latest records, suggesting that some of these buildings have since been renovated with  
47 modern glass facade. This points to a growing trend of facade renewal in the most recent construction  
48 period.

49 Supplementary Figure. S9 presents the distribution of building age for each facade material type  
50 across different cities. In all cities, modern materials such as glass and metal correspond to younger  
51 buildings, with median ages typically below 50 years, reflecting their widespread adoption in recent  
52 decades alongside the rise of commercial and industrial construction. Tile and concrete buildings also  
53 tend to be relatively young, consistent with mid-to-late 20th century construction practices. In contrast,  
54 traditional materials such as brick and stone are found predominantly in older buildings, with median  
55 ages commonly exceeding 100 years, particularly in Amsterdam and Paris where historic building stock  
56 remains largely intact. These differences highlight the close relationship between facade material and  
57 construction era, as dominant building materials have shifted over time in response to changing construc-  
58 tion technologies and urban development demands.

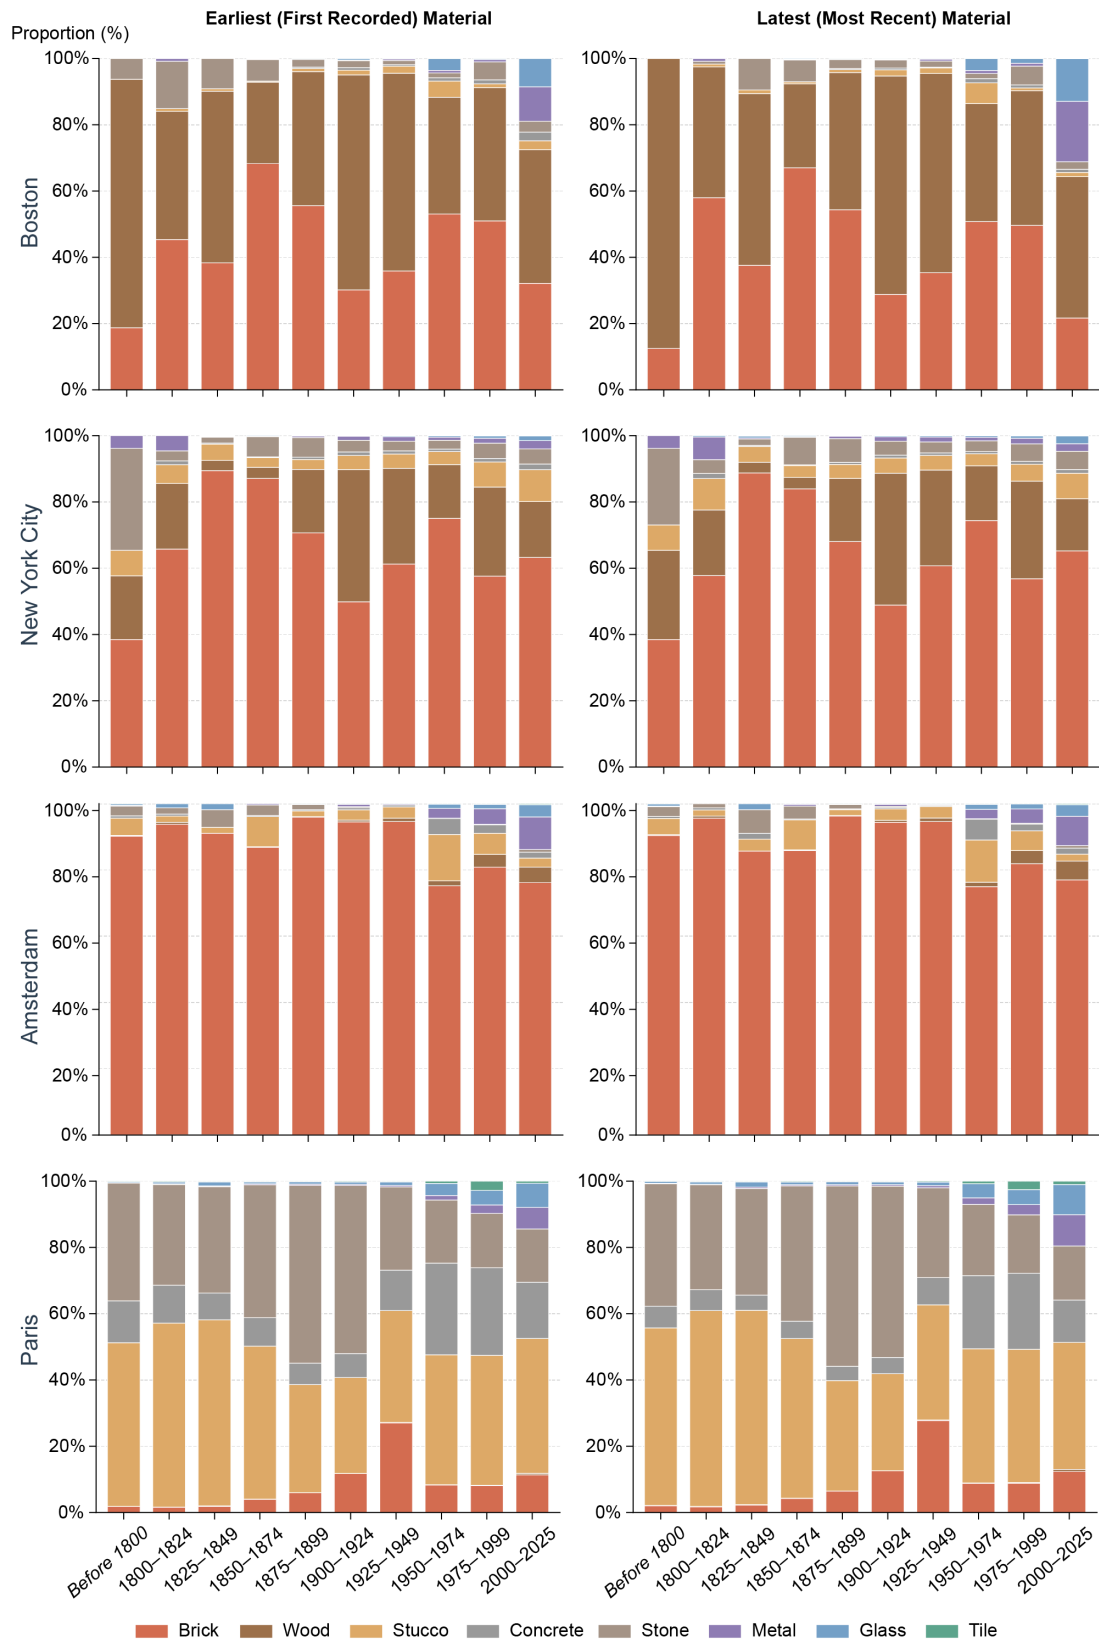

**Supplementary Figure. S8.** Building facade material composition by construction era. Left column: earliest recorded facade material per building; right column: most recent recorded material.

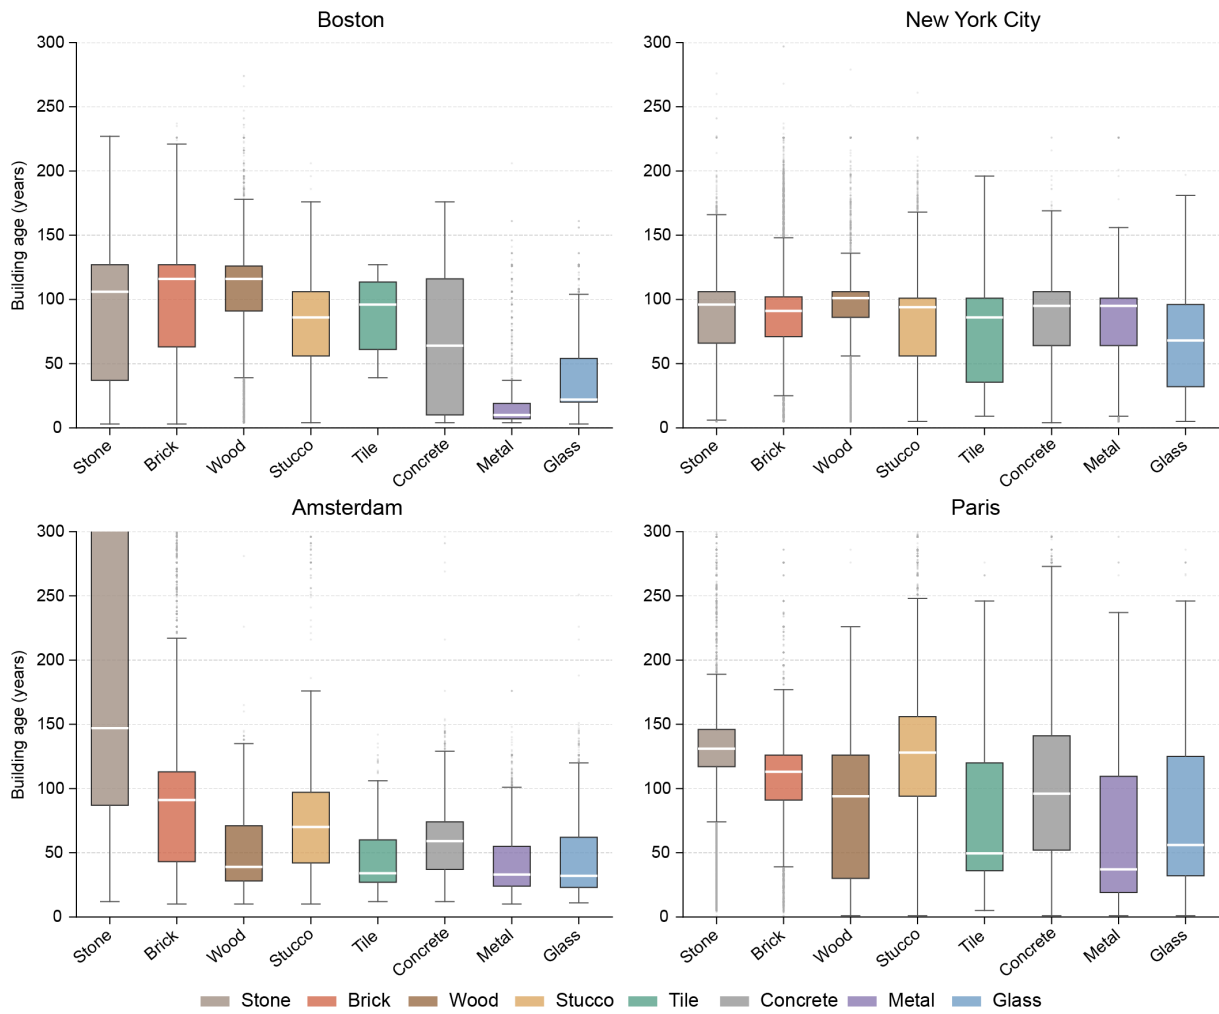

**Supplementary Figure. S9.** Building age distribution by facade material across different cities.

## 59 **References**

- 60 Dosovitskiy, A. (2020). An image is worth 16x16 words: Transformers for image recognition at scale.  
61 *arXiv preprint arXiv:2010.11929*.
- 62 He, K., Zhang, X., Ren, S., and Sun, J. (2016). Deep residual learning for image recognition. In  
63 *Proceedings of the IEEE conference on computer vision and pattern recognition*, pages 770–778.
- 64 Howard, A., Sandler, M., Chu, G., Chen, L.-C., Chen, B., Tan, M., Wang, W., Zhu, Y., Pang, R., Va-  
65 sudevan, V., et al. (2019). Searching for mobilenetv3. In *Proceedings of the IEEE/CVF international*  
66 *conference on computer vision*, pages 1314–1324.
- 67 Huang, G., Liu, Z., Van Der Maaten, L., and Weinberger, K. Q. (2017). Densely connected convolutional  
68 networks. In *Proceedings of the IEEE conference on computer vision and pattern recognition*, pages  
69 4700–4708.
- 70 Ma, N., Zhang, X., Zheng, H.-T., and Sun, J. (2018). Shufflenet v2: Practical guidelines for efficient cnn  
71 architecture design. In *Proceedings of the European conference on computer vision (ECCV)*, pages  
72 116–131.
- 73 Simonyan, K. and Zisserman, A. (2014). Very deep convolutional networks for large-scale image recog-  
74 nition. *arXiv preprint arXiv:1409.1556*.
- 75 Tan, M. and Le, Q. (2019). Efficientnet: Rethinking model scaling for convolutional neural networks. In  
76 *International conference on machine learning*, pages 6105–6114. PMLR.
- 77 Zhu, X. X., Chen, S., Zhang, F., Shi, Y., and Wang, Y. (2025). Globalbuildingatlas: an open global  
78 and complete dataset of building polygons, heights and lod1 3d models. *Earth System Science Data*  
79 *Discussions*, 2025:1–31.
